# Supplementary material
Source: PubMed Central journal article supplement (PMC4816710)

# Supplemental Figure 1

A

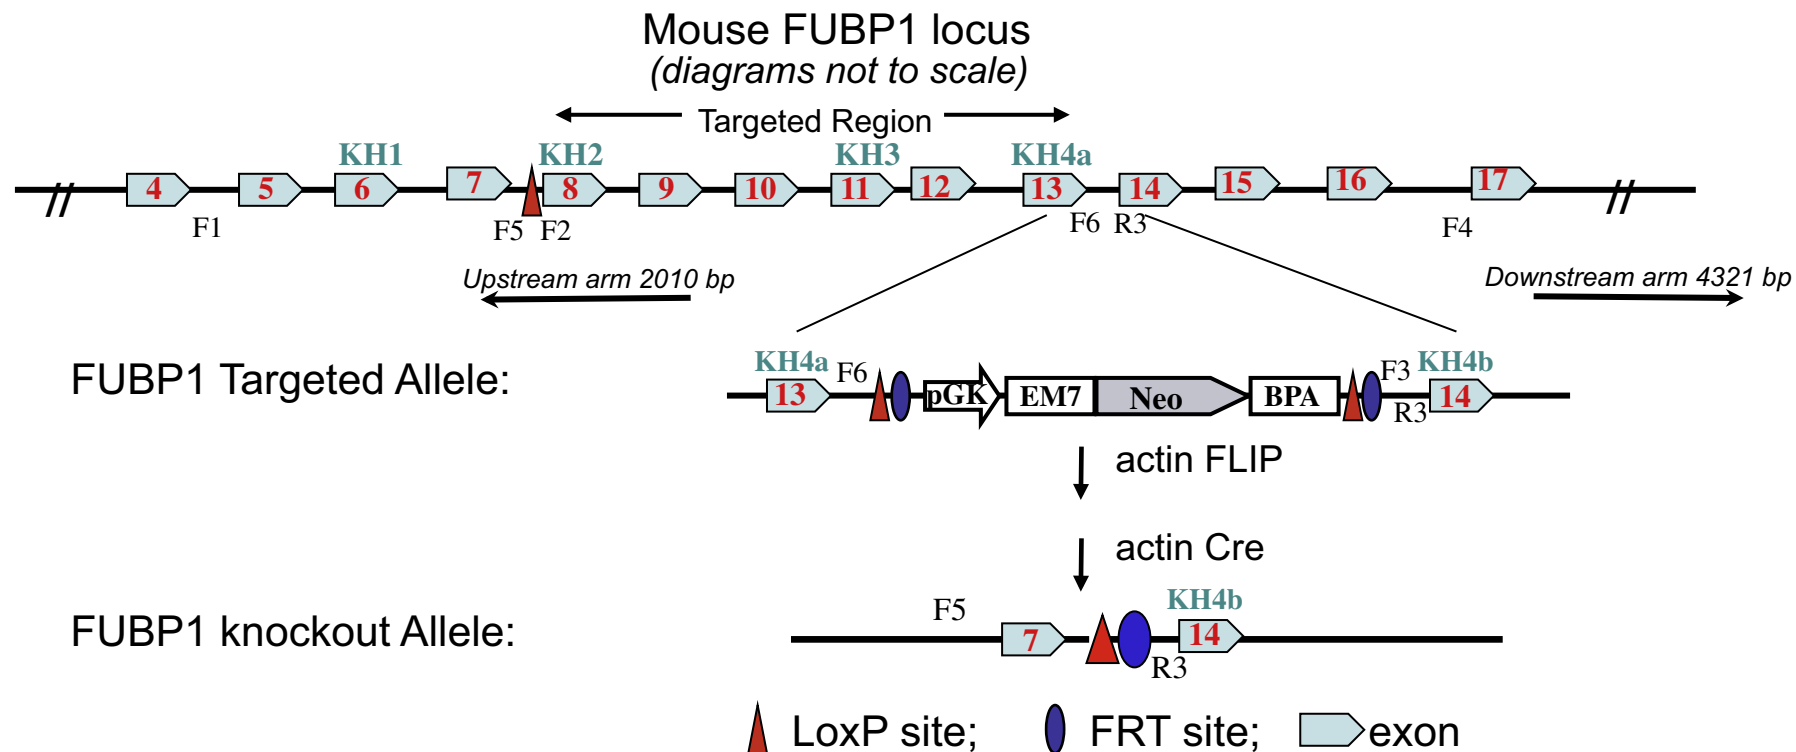

B

F5\_F / R3 detects FBP KO, with a PCR product of ~ 188 bp

F6\_F / R3 detects FBP WT, with a PCR product of ~ 207 bp

Annealing temperature: 62°C

F5: Top strand, 19090 - 19112 of mFBP\_Celera, Tm 66°C  
5' -GGATAAGTTGGGTTATGCTACGT-3'

R3: Bottom Strand, 21224 - 21246 of mFBP\_Celera, Tm 66°C  
5' -AGCCTGTTCTTCCATCTAGAACT-3'

F6: Top strand, 21039 - 21062 of mFBP\_Celera, Tm 66°C  
5' -GTCTGTCAGTTACAAAACCTTGATC-3'

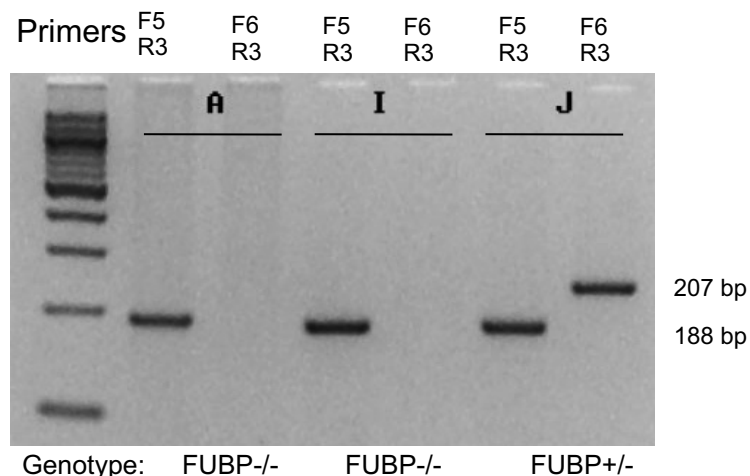

Supplement: mmc1.pdf [file mmc1.pdf]
