# Supplementary material
Source: PubMed Central journal article supplement (PMC4816710)

Supplemental Figure 2

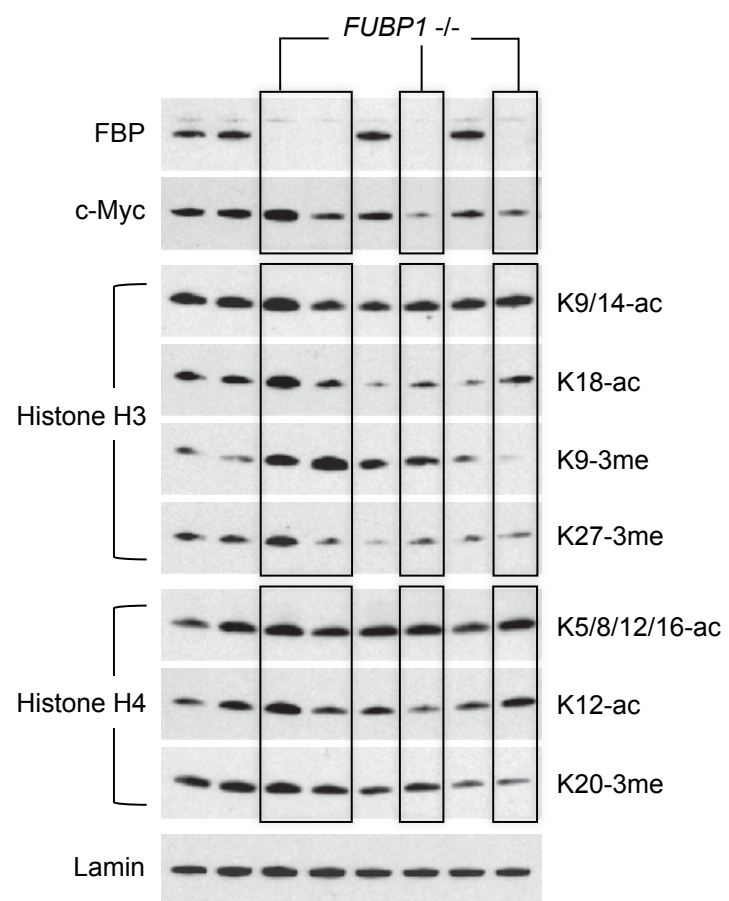

Supplement: mmc2.pdf [file mmc2.pdf]
